# Supplementary material
Source: Springer Nature journal article supplement (https://www.springermedizin.de/resource/supplementary/12962_2008_84_MOESM5_ESM.pdf/9572164)

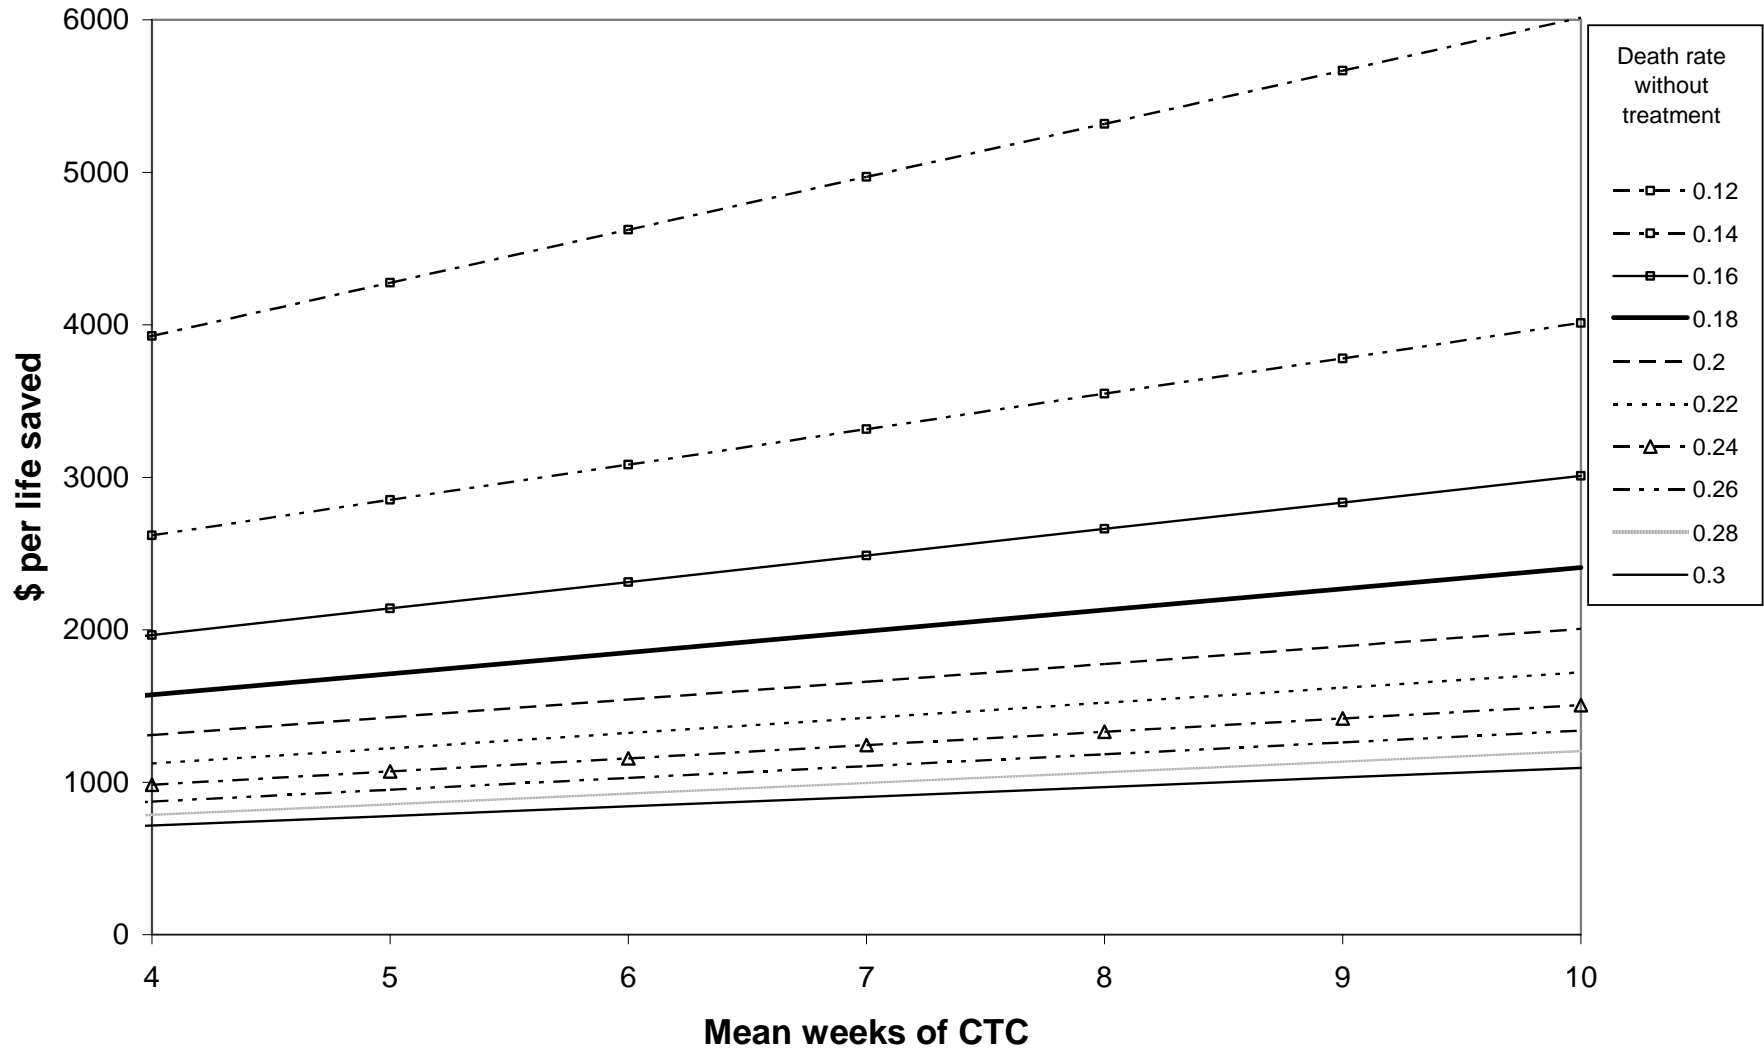

Supplement: MOESM5 [file 9572164]
